# Supplementary material
Source: PubMed Central journal article supplement (PMC5580026)
Supplement: NIHMS898300-supplement-Supp_Figs.pdf [file NIHMS898300-supplement-Supp_Figs.pdf]

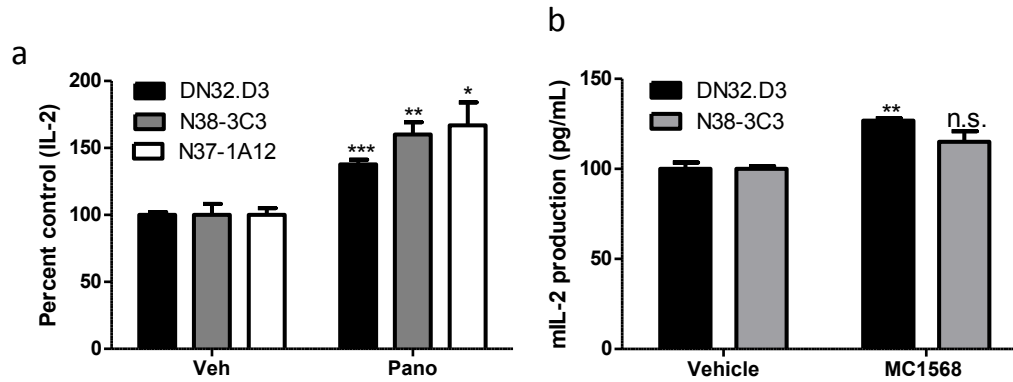

**c**

|                               | Trichostatin A (TSA)                                                  | LBH589 (Panobinostat)                       | MC1568                                      |
|-------------------------------|-----------------------------------------------------------------------|---------------------------------------------|---------------------------------------------|
| <b>Class of HDACi</b>         | Hydroxamic acid                                                       | Cinnamic hydroxamic acid                    | (Aryloxypropenyl) pyrrolyl hydroxyamide     |
| <b>Known to inhibit HDACs</b> | Class I and II HDACs: 1, 2, 3, 4, 6 and 10                            | All class I, II, and IV HDACs: 1-11         | Class II HDACs: 4-7, 9, 10                  |
| <b>Functional effects</b>     | Enhances CD1d-mediated and MHC class II-mediated antigen presentation | Enhances CD1d-mediated antigen presentation | Enhances CD1d-mediated antigen presentation |

**Supplementary figure 1. a** JeKo-1 were treated with 50 nM MC1568 for 4 h, washed, and co-cultured with DN32.D3 and N38-3C3. **b** LCD1d were treated with 10 nM LBH589 for 4 h, washed, and co-cultured with DN32.D3, N38-3C3, and N37-1A12. **c** The table summarizes the different HDACi tested and their functional effects on CD1d and MHC class II-mediated antigen presentation.

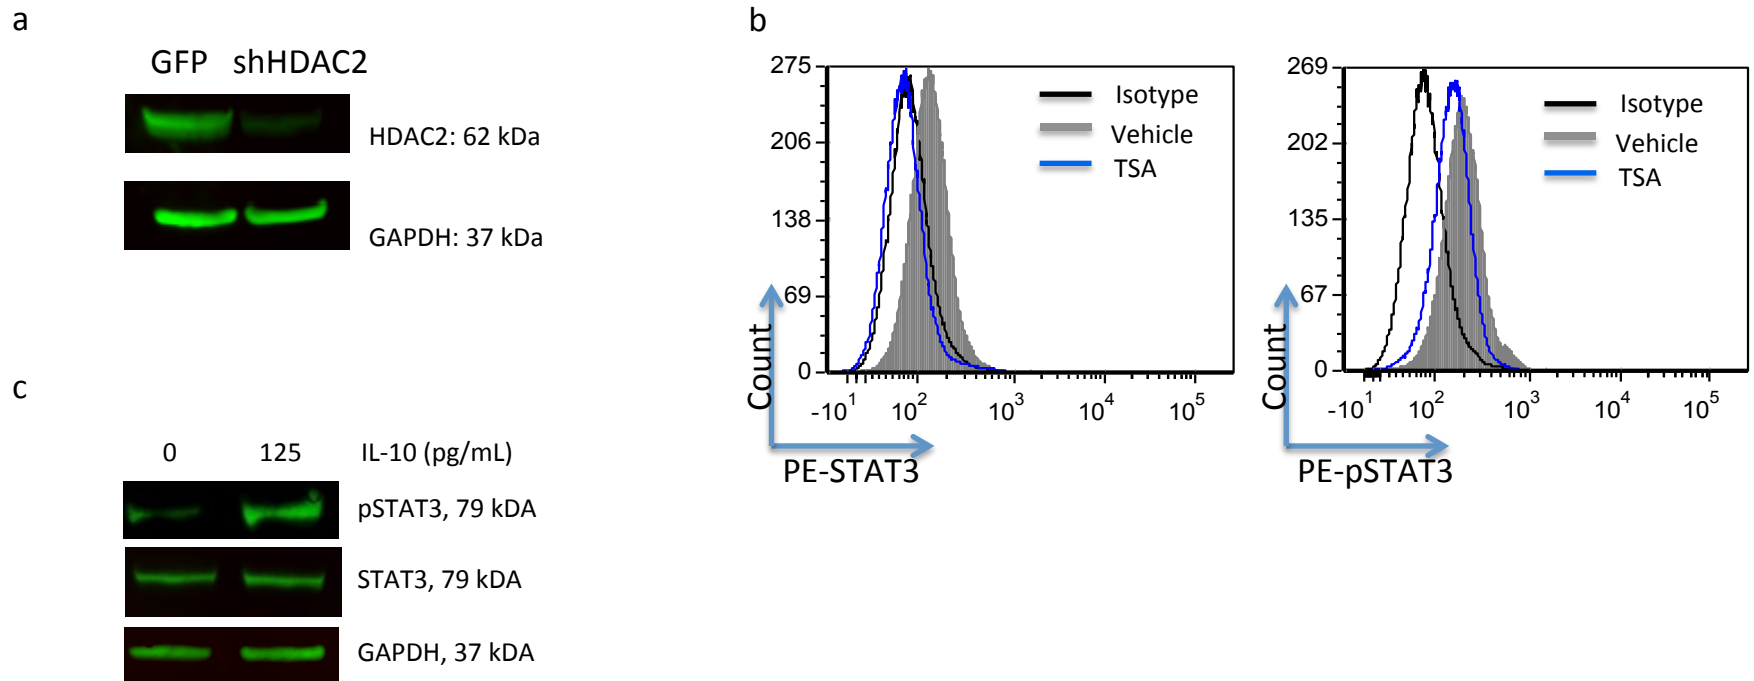

**Supplementary figure 2.** **a** HDAC2 levels were assessed in JeKo-1-shHDAC2 transductants expressing low and high cell surface levels of CD1d. **b** JeKo-1 cells were treated with TSA and levels of STAT3 and phosphorylated STAT3 (pY705) were assessed by flow cytometry. Black histogram: isotype control mAb. Grey histogram: vehicle. Blue histogram: TSA. **c** LCD1d cells were treated with IL-10 and induction of STAT3 was confirmed by performing Western blot analysis.
